# Supplementary material
Source: PubMed Central journal article supplement (PMC6594011)
Supplement: NIHMS1024591-supplement-Suppl1.pdf [file NIHMS1024591-supplement-Suppl1.pdf]

## **A comprehensive screening of copy-number variability in dementia with Lewy bodies**

Celia Kun-Rodrigues<sup>1</sup>, Tatiana Orme<sup>1, 2</sup>, Susana Carmona<sup>1, 2</sup>, Dena G. Hernandez<sup>3, 4</sup>, Owen A. Ross<sup>5</sup>, John D. Eicher<sup>6</sup>, Claire Shepherd<sup>7</sup>, Laura Parkkinen<sup>8</sup>, Lee Darwent<sup>1, 2</sup>, Michael G. Heckman<sup>9</sup>, Sonja W. Scholz<sup>10</sup>, Juan C. Troncoso<sup>11</sup>, Olga Pletnikova<sup>11</sup>, Olaf Ansorge<sup>8</sup>, Jordi Clarimon<sup>12</sup>, Alberto Lleo<sup>12</sup>, Estrella Morenas-Rodriguez<sup>12</sup>, Lorraine Clark<sup>13</sup>, Lawrence S Honig<sup>13</sup>, Karen Marder<sup>13</sup>, Afina Lemstra<sup>14</sup>, Ekaterina Rogaeva<sup>15</sup>, Peter St. George-Hyslop<sup>15, 16</sup>, Elisabet Londos<sup>17</sup>, Henrik Zetterberg<sup>18</sup>, Imelda Barber<sup>19</sup>, Anne Braae<sup>19</sup>, Kristelle Brown<sup>19</sup>, Kevin Morgan<sup>19</sup>, Claire Troakes<sup>20</sup>, Safa Al-Sarraj<sup>20</sup>, Tammarny Lashley<sup>21</sup>, Janice Holton<sup>21</sup>, Yaroslau Compta<sup>22</sup>, Vivianna Van Deerlin<sup>23</sup>, Geidy E Serrano<sup>24</sup>, Thomas G Beach<sup>24</sup>, Suzanne Lesage<sup>25</sup>, Douglas Galasko<sup>26</sup>, Eliezer Masliah<sup>27</sup>, Isabel Santana<sup>28</sup>, Pau Pastor<sup>29</sup>, Monica Diez-Fairen<sup>29</sup>, Miquel Aguilar<sup>29</sup>, Pentti J. Tienari<sup>30</sup>, Liisa Myllykangas<sup>31</sup>, Minna Oinas<sup>32</sup>, Tamas Revesz<sup>21</sup>, Andrew Lees<sup>21</sup>, Brad F Boeve<sup>33</sup>, Ronald C. Petersen<sup>33</sup>, Tanis J Ferman<sup>34</sup>, Valentina Escott-Price<sup>35</sup>, Neill Graff-Radford<sup>36</sup>, Nigel J. Cairns<sup>37</sup>, John C. Morris<sup>37</sup>, Stuart Pickering-Brown<sup>38</sup>, David Mann<sup>38</sup>, Glenda M. Halliday<sup>39, 40</sup>, John Hardy<sup>1</sup>, John Q. Trojanowski<sup>23</sup>, Dennis W. Dickson<sup>5</sup>, Andrew Singleton<sup>3</sup>, David J. Stone<sup>41</sup>, Rita Guerreiro<sup>1, 2, 42</sup>, Jose Bras<sup>1, 2, 42,\*</sup>

\* Corresponding author. Email: [j.bras@ucl.ac.uk](mailto:j.bras@ucl.ac.uk)

1 - Department of Molecular Neuroscience, UCL Institute of Neurology, London, UK

2 - UK Dementia Research Institute (UK DRI) at UCL, London, UK

3 - Laboratory of Neurogenetics, National Institutes on Aging, NIH, Bethesda, MD, USA

4 - German Center for Neurodegenerative Diseases (DZNE)-Tubingen

5 - Department of Neuroscience, Mayo Clinic, Jacksonville, FL, USA

6 - Genetics and Pharmacogenomics, Merck Research Laboratories, Boston, MA, USA

7 - Neuroscience Research Australia, Sydney, Australia and School of Medical Sciences, Faculty of Medicine, University of New South Wales, Sydney, Australia

8 - Nuffield Department of Clinical Neurosciences, Oxford Parkinsons Disease Centre, University of Oxford, Oxford, UK

9 - Division of Biomedical Statistics and Informatics, Mayo Clinic, Jacksonville, FL, USA

10 - Neurodegenerative Diseases Research Unit, National Institute of Neurological Disorders and Stroke, National Institutes of Health, Bethesda, Maryland, USA

11 - Department of Pathology (Neuropathology), Johns Hopkins University School of Medicine, Baltimore, MD, USA

12 - Memory Unit, Department of Neurology, IIB Sant Pau, Hospital de la Santa Creu i Sant Pau, Universitat Autònoma de Barcelona, Barcelona, Spain; Centro de Investigación Biomedica en Red en Enfermedades Neurodegenerativas (CIBERNED), Instituto de Salud Carlos III, Madrid, Spain

13 - Taub Institute for Alzheimer Disease and the Aging Brain and Department of Pathology and Cell Biology, Columbia University, New York, NY, USA

14 - Department of Neurology and Alzheimer Center, Neuroscience Campus Amsterdam, VU University Medical Center, Amsterdam, the Netherlands

15 - Tanz Centre for Research in Neurodegenerative Diseases and department of Medicine, University of Toronto, Ontario, Canada

16 - Department of Clinical Neurosciences, Cambridge Institute for Medical Research, University of Cambridge, Cambridge, UK

17 - Clinical Memory Research Unit, Institution of Clinical Sciences Malmö, Lund University, Sweden

18 - UK Dementia Research Institute at UCL, London UK, Department of Molecular Neuroscience, UCL Institute of Neurology, London, UK and Clinical Neurochemistry Laboratory, Institute of Neuroscience and Physiology, Sahlgrenska Academy at the University of Gothenburg, Mölndal, Sweden

19 - Human Genetics, School of Life Sciences, Queens Medical Centre, University of Nottingham, Nottingham, UK

20 - Department of Basic and Clinical Neuroscience and Institute of Psychiatry, Psychology and Neuroscience, Kings College London, London, UK

21 - Queen Square Brain Bank, Department of Molecular Neuroscience, UCL Institute of Neurology, London, UK

22 - Queen Square Brain Bank, Department of Molecular Neuroscience, UCL Institute of Neurology, London, UK and Movement Disorders Unit, Neurology Service, Clinical Neuroscience Institute (ICN), Hospital Clinic, University of Barcelona, IDIBAPS, Barcelona, Spain

23 - Department of Pathology and Laboratory Medicine, Center for Neurodegenerative Disease Research, Perelman School of Medicine at the University of Pennsylvania, 3600 Spruce Street, Philadelphia, USA

24 - Banner Sun Health Research Institute, 10515 W Santa Fe Drive, Sun City, AZ 85351, USA

25 - Inserm U1127, CNRS UMR7225, Sorbonne Universités, UPMC Univ Paris 06, UMR and S1127, Institut du Cerveau et de la Moelle épinière, Paris, France

26 - Department of Neurosciences, University of California, San Diego, La Jolla, CA, United States; Veterans Affairs San Diego Healthcare System, La Jolla, CA, United States

27 - Department of Neurosciences, University of California, San Diego, La Jolla, CA, United States; Department of Pathology, University of California, San Diego, La Jolla, CA, United States

28 - Neurology Service, University of Coimbra Hospital, Coimbra, Portugal

29 - Memory Unit, Department of Neurology, University Hospital Mutua de Terrassa, University of Barcelona, and Fundació de Docència i Recerca Mutua de Terrassa, Terrassa,

Barcelona, Spain. Centro de Investigacion Biomedica en Red Enfermedades Neurdegenerativas (CIBERNED), Madrid, Spain

30 - Molecular Neurology, Research Programs Unit, University of Helsinki, Department of Neurology, Helsinki University Hospital, Helsinki, Finland

31 - Department of Pathology, Haartman Institute, University of Helsinki and HUSLAB

32 - Department of Neuropathology and Neurosurgery, Helsinki University Hospital and University of Helsinki, Helsinki, Finland

33 - Neurology Department, Mayo Clinic, Rochester, MN, USA

34 - Department of Psychiatry and Department of Psychology, Mayo Clinic, Jacksonville, FL, USA

35 - MRC Centre for Neuropsychiatric Genetics and Genomics, School of Medicine, Cardiff University, Cardiff, UK

36 - Department of Neurology, Mayo Clinic, Jacksonville, FL, USA

37 - Knight Alzheimers Disease Research Center, Department of Neurology, Washington University School of Medicine, Saint Louis, MO, USA

38 - Institute of Brain, Behaviour and Mental Health, Faculty of Medical and Human Sciences, University of Manchester, Manchester, UK

39 - Neuroscience Research Australia, Sydney, Australia and School of Medical Sciences, Faculty of Medicine, University of New South Wales, Sydney, Australia

40 - Brain and Mind Centre, Sydney Medical School, The University of Sydney, Sydney, Australia

41 - Genetics and Pharmacogenomics, Merck Research Laboratories, West Point, Pennsylvania, USA

42 - Department of Medical Sciences and Institute of Biomedicine, iBiMED, University of Aveiro, 3810-193 Aveiro, Portugal

## Supplementary Figure 1. Study overview.

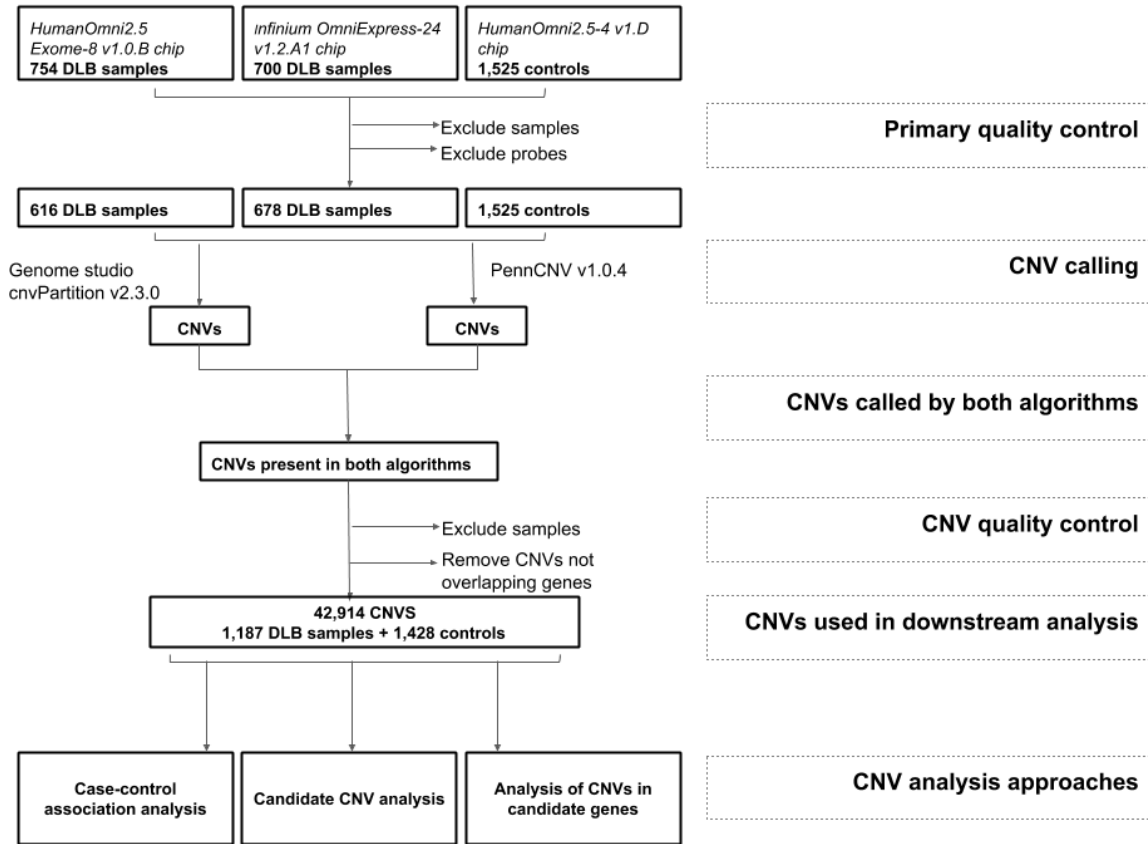

Overview of methods, quality control steps, samples and different analyses performed in this study.

**Supplementary Table 1. CNVs previously associated with AD, PD and FTD studied in the candidate CNVs approach.**

| <b>AD</b>                   |                          |                                                                                                                                                                            |
|-----------------------------|--------------------------|----------------------------------------------------------------------------------------------------------------------------------------------------------------------------|
| 15q11.2                     | Ghani et al., 2012       | <i>CYFIP1,NIPA1,NIPA2,TUBGCP5,WHAMML1</i>                                                                                                                                  |
| 15q13.3                     | Heinzen et al., 2010     | <i>CHRNA7</i>                                                                                                                                                              |
| <i>APC2</i>                 | Zheng et al., 2015       |                                                                                                                                                                            |
| chr16:29,554,843-30,105,652 | Zheng et al., 2014       | <i>ASPHD1,ALDOA,BOLA2,C16orf54,C16orf92,CDIPT,CDIPT-AS1,DOC2A,FAM57B,HIRIP3,INO80E,KCTD13,KIF22,MAZ,MVP,PAGR1,PPP4C,PRRT2,QPRT,SEZ6L2,SPN,TAOK2,TBX6,TMEM219,YPEL,ZG16</i> |
| <i>CHRFAM7A</i>             | Swaminathan et al., 2011 |                                                                                                                                                                            |
| <i>CNTLN</i>                | Zheng et al., 2015       |                                                                                                                                                                            |
| <i>CSMD1</i>                | Swaminathan et al., 2011 |                                                                                                                                                                            |
| <i>HLA-DRA</i>              | Swaminathan et al., 2012 |                                                                                                                                                                            |
| <i>HNRNPCL1</i>             | Swaminathan et al., 2011 |                                                                                                                                                                            |
| <i>JAG2</i>                 | Zheng et al., 2015       |                                                                                                                                                                            |
| <i>SET</i>                  | Zheng et al., 2015       |                                                                                                                                                                            |
| <i>ZFPM1</i>                | Zheng et al., 2015       |                                                                                                                                                                            |
| <b>PD</b>                   |                          |                                                                                                                                                                            |
| 22q11.2                     | Mok et al., 2016         |                                                                                                                                                                            |
| <i>DOCK5</i>                | Pankratz et al., 2011    |                                                                                                                                                                            |
| <i>OVOS2</i>                | Liu et al., 2013         |                                                                                                                                                                            |
| <i>TH</i>                   | Bademci et al., 2010     |                                                                                                                                                                            |
| <i>USP32</i>                | Pankratz et al., 2011    |                                                                                                                                                                            |
| <b>FTD</b>                  |                          |                                                                                                                                                                            |
| <i>RUNDC3A</i>              | Gijssels et al., 2008    |                                                                                                                                                                            |
| <i>SLC25A39</i>             | Gijssels et al., 2008    |                                                                                                                                                                            |

**Supplementary Table 2. Genes previously associated with DLB-related diseases and studied in the candidate genes approach.**

| <b>AD</b>               |          |          |             |        |         |         |
|-------------------------|----------|----------|-------------|--------|---------|---------|
| APP                     | PSEN1    | PSEN2    | APOE        | TREM2  | CLU     | PICALM  |
| CR1                     | BIN1     | MS4A6A   | MS4A4E      | CD33   | ABCA7   | CD2AP   |
| EPHA1                   | HLA-DRB5 | HLA-DRB1 | SORL1       | PTK2B  | SLC24A4 | ZCWPW1  |
| CELF1                   | FERMT2   | CASS4    | INPP5D      | MEF2C  | NME8    |         |
| <b>PD</b>               |          |          |             |        |         |         |
| SNCA                    | PARK2    | PINK1    | PARK7/DJ-1  | LRRK2  | PLA2G6  | FBXO7   |
| VPS35                   | ATP13A2  | DNAJC6   | SYNJ1       | GBA    | MAPT    | RAB7L1  |
| BST1                    | GAK      | ACMSD    | STK39       | SYT11  | FGF20   | STX1B   |
| GPNMB                   | SIPA1L2  | INPP5F   | MIR4697HG   | GCH1   | VPS13C  | DDRDK1  |
| MCCC1                   | SCARB2   | CCDC62   | RIT2        | SREBF1 |         |         |
| <b>FTD</b>              |          |          |             |        |         |         |
| GRN                     | CHMP2B   | HNRNPA1  | HNRNPA2B1   | SQSTM1 | OPTN    | CHCHD10 |
| VCP                     | SIGMAR1  | PRKAR1B  | TMEM106B    | UBQLN2 | ATXN2   |         |
| <b>DLB</b>              |          |          |             |        |         |         |
| CNTN1                   | CYP2D6   | EIF4G1   | BCL7C/STX1B | GABRB3 | GIGYF2  | PRNP    |
| SNCB                    | SOX17    |          |             |        |         |         |
| <b>Additional genes</b> |          |          |             |        |         |         |
| ANG                     | CCNF     | CSF1R    | CSF1R       | CTSC   | CYLD    | DCTN1   |
| FUS                     | GLE1     | ITM2B    | MATR3       | NEK1   | NOTCH3  | PFN1    |
| PNPLA6                  | RAB38    | SERPINI1 | SERPINI1    | SOD1   | TAF15   | TARDBP  |
| TBK1                    | TIA1     | TUBA4A   | TYROBP      | VAPB   |         |         |
